# Supplementary material
Source: PubMed Central journal article supplement (PMC5115464)
Supplement: ADVS-3-0f-s001.pdf [file ADVS-3-0f-s001.pdf]

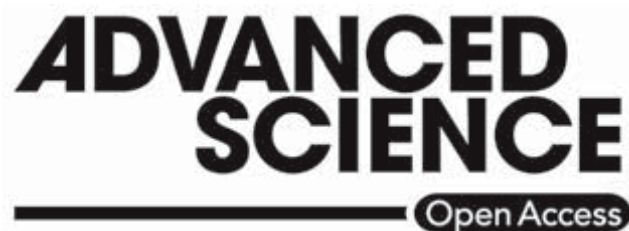

## Supporting Information

for *Adv. Sci.*, DOI: 10.1002/advs.201500186

Metal–Organic-Framework-Derived Dual Metal- and Nitrogen-Doped Carbon as Efficient and Robust Oxygen Reduction Reaction Catalysts for Microbial Fuel Cells

*Haolin Tang,\* Shichang Cai, Shilei Xie, Zhengbang Wang, Yexiang Tong, Mu Pan, and Xihong Lu\**

## Supporting Information

**Metal Organic Framework Derived Dual Metal and Nitrogen doped Carbon as Efficient and Robust Oxygen Reduction Reaction Catalysts for Microbial Fuel Cells**

Haolin Tang,<sup>a\*</sup> Shichang Cai,<sup>a</sup> Shilei Xie,<sup>b</sup> Zhengbang Wang,<sup>c</sup> Yexiang Tong,<sup>b</sup> Mu Pan,<sup>a</sup> and Xihong Lu<sup>b\*</sup>

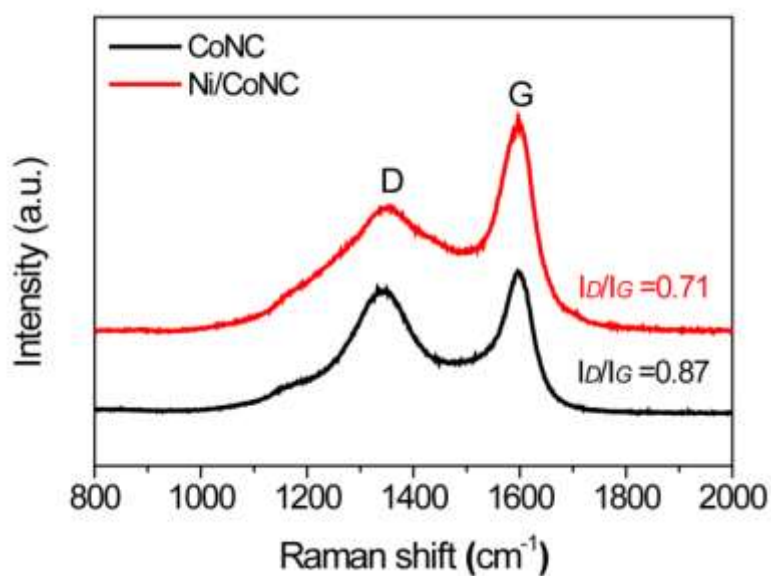

**Figure S1.** Raman spectra of the CoNC and Ni/CoNC catalysts.

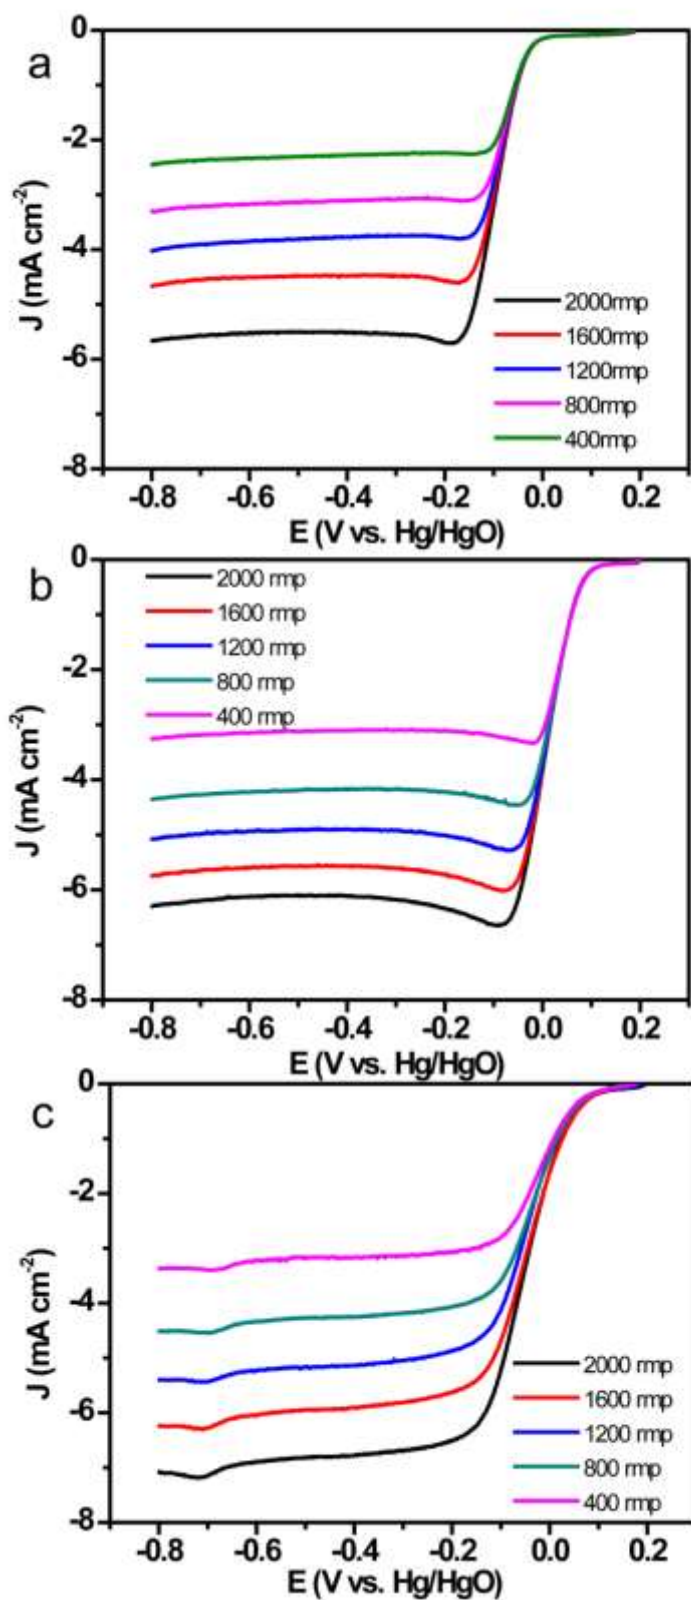

**Figure S2.** LSV curves of (a) CoNC catalyst, (b) CoNC catalyst and (c) Pt/C catalyst in 0.1M KOH solution saturated with O<sub>2</sub> at different rotating speeds.

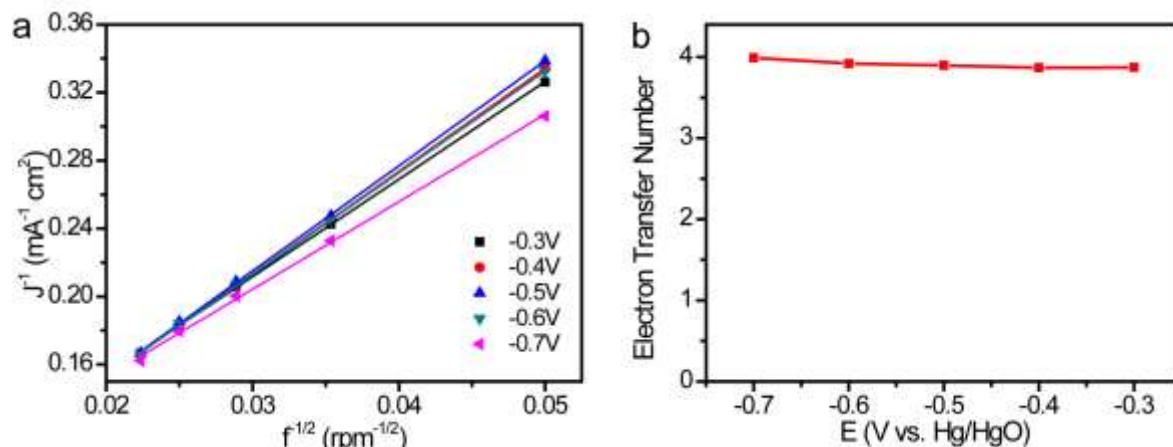

**Figure S3.** (a) Koutecky–Levich (K-L) plots of the Pt/C electrode at different potentials. (d) The calculated ORR electron-transfer number for the Pt/C catalyst at different potentials.

**Table S1.** Summary of ORR parameters of various electrocatalysts in alkaline media

|                                  | $J_{@-0.6V}$ (mA cm <sup>-2</sup> ) | $E_{ocp}$ (V vs. Hg/HgO) | $E_{1/2}$ (V vs. Hg/HgO) | n             | ref             |
|----------------------------------|-------------------------------------|--------------------------|--------------------------|---------------|-----------------|
| <b>Ni/CoNC</b>                   | <b>6.24</b>                         | <b>0.070</b>             | <b>-0.049</b>            | <b>3.94-4</b> | <b>Our work</b> |
| 20% Pt/C                         | 5.74                                | -0.033                   | 0.018                    | 3.87-3.99     | Our work        |
| nitrogen-doped carbon nanofibers | 6.1                                 | 0.12                     | -0.22                    | 3.8           | 2               |
| Fe/N doped C (1500r)             | ~5.1                                | 0.20                     | 0.03                     |               | 4               |
| N doped graphene                 | 0.48                                | -0.04                    | -0.35                    |               | 3               |
| N-Fe/Fe <sub>3</sub> C@C         | 6.4                                 | 0.21                     | 0.14                     | 3.98          | 1               |
| N-P codoped porous carbon foams  | 4.9                                 | 0.19                     | -0.11                    | 3.7-3.8       | 5               |
| PEDOT hollow spheres             | 2.5/1400r                           | ~0.1                     | -0.27                    | 3.11          | 8               |
| S doped RGO                      | 4.7                                 | ~0.16                    | -0.12                    | 3-3.5         | 6               |
| Fe-N co-doped Carbon             | 5.44                                | 0.197                    | -0.17                    | 3.86          | 7               |

[1] Z. Wen, S. Ci, F. Zhang, X. Feng, S. Cui, S. Mao, S. Luo, Z. He, J. Chen, *Adv. Mater.* **2012**, *24*, 1399.

- [2] X. Yang, W. Zou, Y. Su, Y. Zhu, H. Jiang, J. Shen, C. Li, *J. Power Sources* **2014**, 266, 36.
- [3] L. Feng, Y. Chen, L. Chen, *ACS Nano* **2011**, 5, 9611.
- [4] L. Birry, P. Mehta, F. Jaouen, J.-P. Dodelet, S. Guioot, B. Tartakovsky, *Electrochim. Acta* **2011**, 56, 1505.
- [5] H. Jiang, Y. Zhu, Q. Feng, Y. Su, X. Yang, C. Li, *Chem. Eur. J.* **2014**, 20, 3106.
- [6] M. Seredych, J.-C. Idrobo, T. J. Bandosz, *J. Mater. Chem. A* **2013**, 1, 7059.
- [7] Y. Su, H. Jiang, Y. Zhu, W. Zou, X. Yang, J. Chen, C. Li, *J. Power Sources* **2014**, 265, 246.
- [8] Z. Guo, Y. Qiao, H. Liu, C. Ding, Y. Zhu, M. Wan, L. Jiang, *J. Mater. Chem.* **2012**, 22, 17153.

**Table S2.** Summary of ORR parameters of various electrocatalysts in neutral media

|                                       | $J_{@-0.6V}$ (mA<br>cm <sup>-2</sup> ) | $E_{ocp}$ (V vs.<br>SCE) | n           | ref             | c (PBS)     |
|---------------------------------------|----------------------------------------|--------------------------|-------------|-----------------|-------------|
| <b>Ni/CoNC</b>                        | <b>6.66</b>                            | <b>0.347</b>             | <b>3.92</b> | <b>Our work</b> | <b>0.01</b> |
| 20% Pt/C                              | 5.72                                   | 0.282                    | 3.81        | Our work        | 0.01        |
| acidic/basic-N-<br>activated carbon   | 7.18                                   | 0.18                     | 4.09        | 9               | 0.1 M       |
| Co-PDAP                               | ~6 (1500 rpm)                          | 0.082                    | 3.96        | 10              | ---         |
| Fe-C-N                                | 6.1 (2500 rpm)                         | 0.2                      | 3.89        | 11              | ---         |
| FeCo- melamine-<br>formaldehyde resin | 5.0 (1500 rpm)                         | 0.88 (RHE)               | 3.96        | 12              | 0.2 M       |

- [9] B. Zhang, Z. Wen, S. Ci, S. Mao, J. Chen, Z. He, *ACS Appl. Mater. Interfaces* 2014, 6, 7464.
- [10] Y. Zhao, K. Watanabe, K. Hashimoto, *J. Am. Chem. Soc.* 2012, 134, 19528.
- [11] Z.-Y. Yang, Y.-X. Zhang, L. Jing, Y.-F. Zhao, Y.-M. Yan, K.-N. Sun, *J. Mater. Chem. A* 2014, 2, 2623.
- [12] Y. Zhao, K. Watanabe, K. Hashimoto, *J. Mater. Chem. A* 2013, 1, 1450.

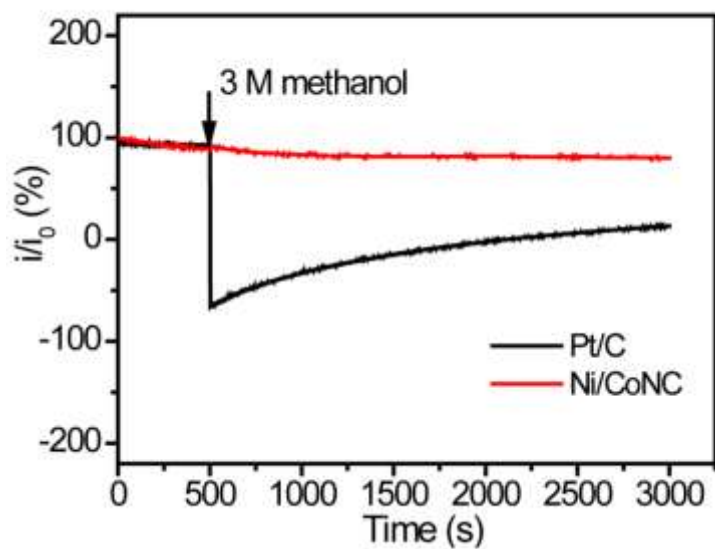

**Figure S4.** tolerance to methanol of the Ni/CoNC and Pt/C electrodes recorded at -0.3 V in  $O_2$ -saturated 10 mM PBS electrolyte with a rotation speed of 1600 rpm.

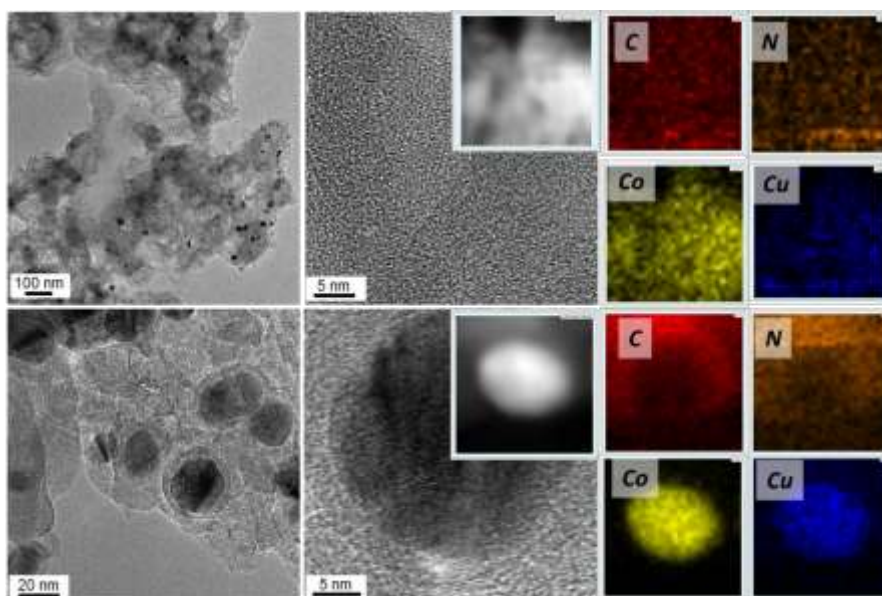

**Figure S5.** TEM, HRTEM and EELS element mapping images of the as-prepared Cu/CoNC catalyst.

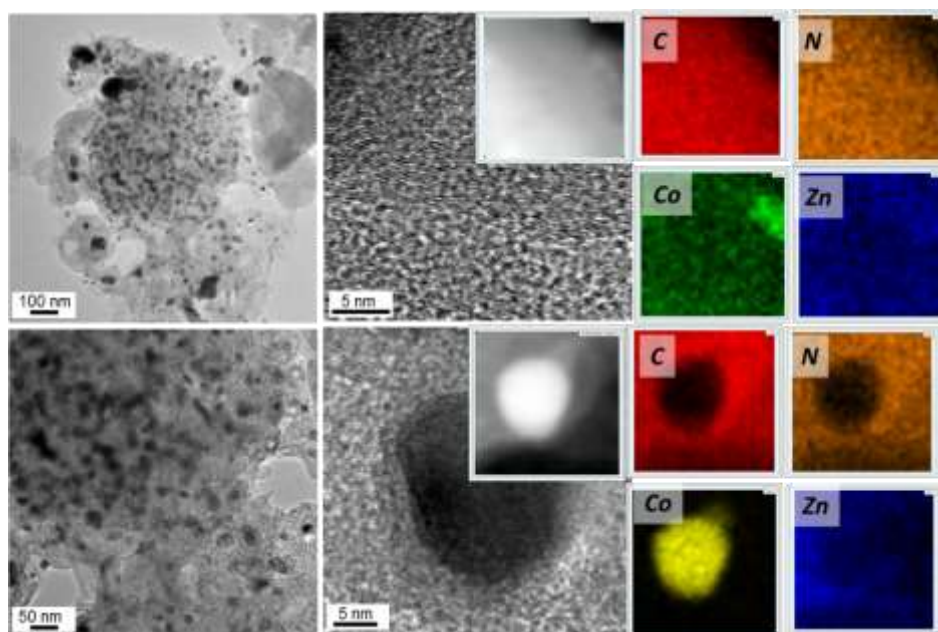

**Figure S6.** TEM, HRTEM and EELS element mapping images of the as-prepared Zn/CoNC catalyst.

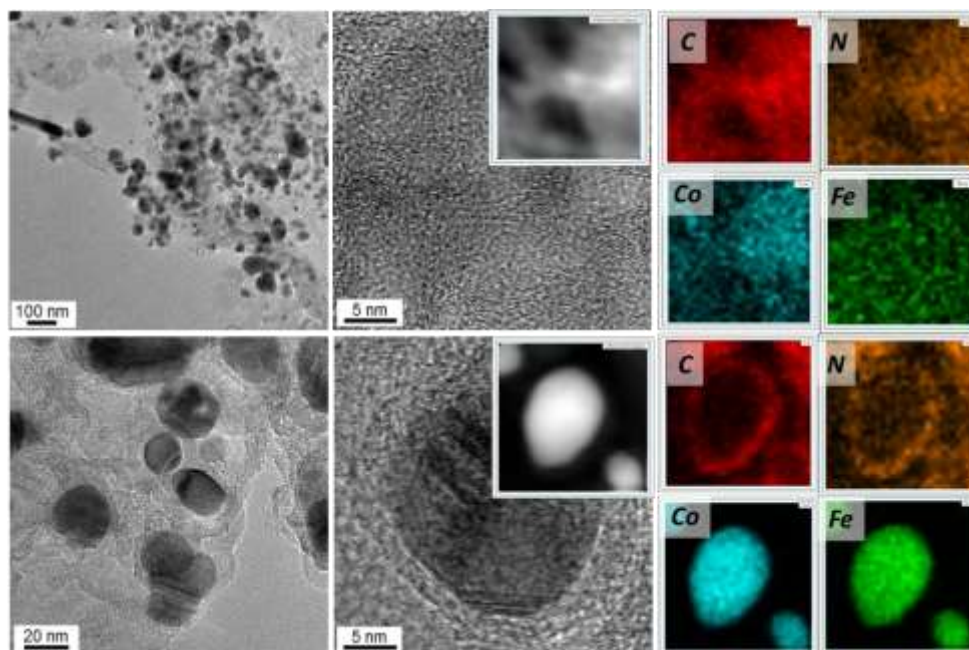

**Figure S7.** TEM, HRTEM and EELS element mapping images of the as-prepared Fe/CoNC catalyst.

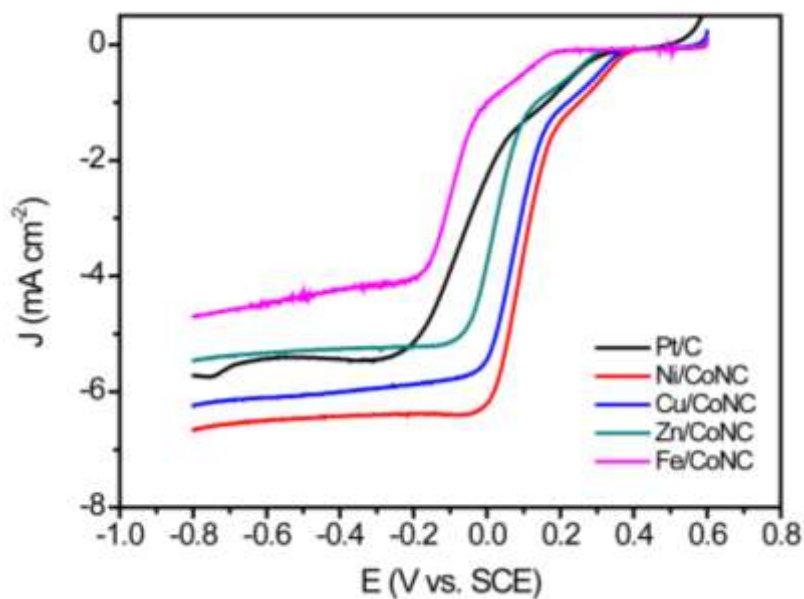

**Figure S8.** LSV curves of the Pt/C, Zn/CoNC, Cu/CoNC, Fe/CoNC and Ni/CoNC catalysts collected in O<sub>2</sub>-saturated 0.01 M PBS at 1600 rpm

**Table S3.** The onset potential and half-wave potential of these catalysts in PBS solution

|         | $J_{@-0.6V}$ (mA cm <sup>-2</sup> ) | $E_{ocp}$ (V vs. SCE) | $E_{1/2}$ (V vs. SCE) |
|---------|-------------------------------------|-----------------------|-----------------------|
| Pt/C    | 5.72                                | 0.282                 | -0.039                |
| Fe/CoNC | 4.70                                | 0.152                 | -0.088                |
| Zn/CoNC | 5.46                                | 0.275                 | 0.034                 |
| Cu/CoNC | 6.24                                | 0.33                  | 0.088                 |
| Ni/CoNC | 6.66                                | 0.347                 | 0.108                 |
